# Supplementary material
Source: PubMed Central journal article supplement (PMC356952)
Supplement: pnas_0308676100_5.pdf [file pnas_0308676100_5.pdf]

**A**

**ARC92 Amino Acid Sequence**

MVPGSEGPARGSVVADVVFIEGTANLGPYFEGLRKHLYLLPAIEYFNGGPPAETDFGGDYGGT  
QYSLVFNVTVDCAPEYVQCHAPTSSAYEFVTWLDGIKFMGGGGESCSLIAEGLSTALQLFDDFK  
KMREQIGQTHRVCCLICNSPPYLLPAVESTTYSGCTTENLVQQIGERGIHFSIVSPRKLPAIRLLFEK  
**AAPPALLEPL**QPPTDVSQDPRHMLVLRGLVLPVGGGSAPGPLQSK**QPVPLPPAAPSG**ATLSAAP  
QQPLPPVPPQYQVPGNLSAAQVAQNAVEAAKNQKAGLGPRFSPITPLQQAAPGVGPPFSQAPA  
PQLPPGPPGAPKPPASQPSLVSTVAPGSLAPTAQPGAPSMAGTVAPGGVSGPSPAQLGAPAL  
GGQQSVSN**KLAWSGVLEWQEKPKPASVDANTKLTRSLPCQVYVNHGENLKTEQWPQ**KLIMQ  
LIPQQLLTLGPLFRNSRMVQFHFTNKDLESKGLYRIMGNGFAGCVHFPHTAPCEVRVLMMLYS  
SKK**KIFMGLIPYDQ**SGFVNDIRQVITNHHKQVQQQKLEQQQRGMGGQQAPPGLGPILEDQARPSQ  
NLLQLRPPQPQPQGTGASGATGQPQPGTAQPPPGAPQGGPGAASGPPPPGPILRPQNPGAN  
PQLRLLLLNPPPPQTGVPPPQASLHHLQPPGAPALLPPPHQGLGQPQLGPPLLHPPPPATRGSC  
AAASAAPGPGAAPVGAPTPASTTTPVLRATTSPSGSTASGKTKERRRGPVSRKMGASLFLCGS  
EEHAYVFNMQTNRVCVERIQPETPL

**B**

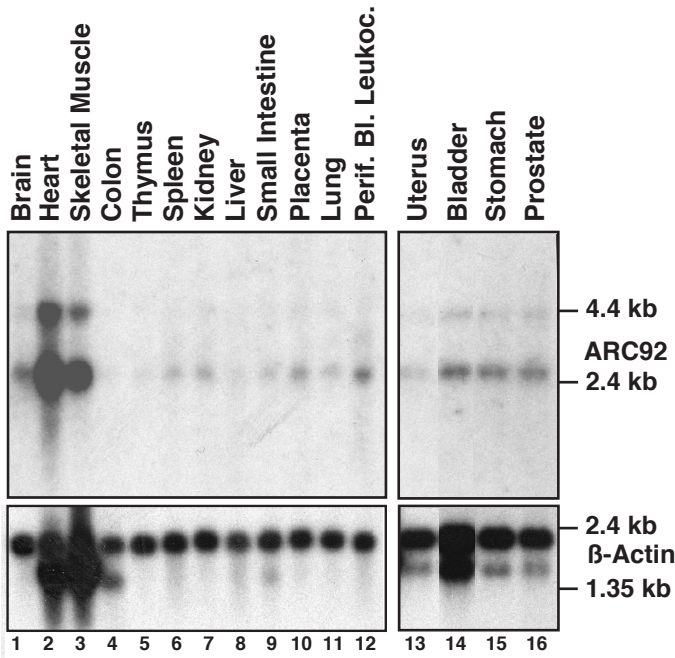

**Tissue Northern blots**
