# Supplementary material
Source: PubMed Central journal article supplement (PMC356952)

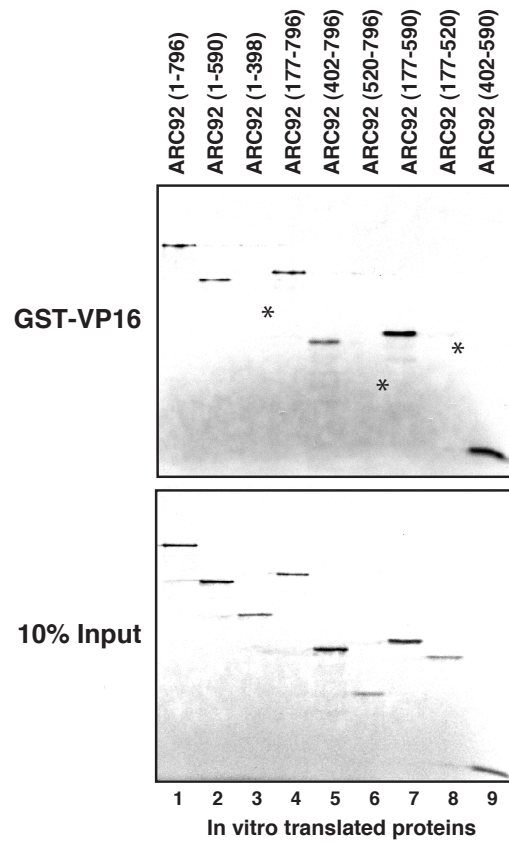

Supplement: pnas_0308676100_4.pdf [file pnas_0308676100_4.pdf]
